# Supplementary material
Source: PubMed Central journal article supplement (PMC3774566)
Supplement: tableS1.pdf [file tableS1.pdf]

**Table S1.** Differential gene expression in *Lasp1*<sup>-/-</sup> MEFs (>2-fold change; P<0.05).

| Gene Symbol   | Description                                                                        | Accession Number          | Fold Change(s)       | P Value(s)          |
|---------------|------------------------------------------------------------------------------------|---------------------------|----------------------|---------------------|
| Col2a1*       | procollagen, type II, alpha 1                                                      | NM_031163                 | 15.171; 6.674; 3.020 | 0.002; 0.000; 0.000 |
| Kng1*         | kininogen 1                                                                        | NM_023125                 | 6.137; 2.662         | 0.0001; 0.0003      |
| Inmt*         | indolethylamine N-methyltransferase                                                | NM_009349                 | 7.755; 2.762         | 0.0001; 0.0002      |
| Sim2          | single-minded homolog 2 (Drosophila)                                               | NM_011377                 | 5.114                | 0.0001              |
| Serpina3g     | serine (or cysteine) peptidase inhibitor, clade A, member 3G                       | XM_354694                 | 4.906                | 0.0001              |
| Il1rn         | interleukin 1 receptor antagonist                                                  | NM_031167                 | 4.745                | 0.0002              |
| Lcn2          | lipocalin 2                                                                        | NM_008491                 | 4.209                | 0.0004              |
| Serpina3h*    | serine (or cysteine) peptidase inhibitor, clade A, member 3H                       |                           | 3.844; 2.654         | 0.0025; 0.0103      |
| Hoxa5         | homeo box A5                                                                       | NM_001034870<br>NM_010453 | 3.701                | 0.0004              |
| Sncg*         | synuclein, gamma                                                                   | NM_011430                 | 3.683; 2.222         | 0.0034; 0.0001      |
| Saa3          | Serum amyloid A3                                                                   | NM_011315                 | 3.661                | 0.0004              |
| CRG-L1        | N-acylsphingosine amidohydrolase 3-like                                            | NM_139306                 | 3.296                | 0.0002              |
| Cxcl1         | chemokine (C-X-C motif) ligand 1                                                   | NM_008176                 | 3.199                | 0.0007              |
| Ankrd1        | ankyrin repeat domain 1 (cardiac muscle)                                           | NM_013468                 | 3.197                | 0.002               |
| A730017D01Rik | RIKEN cDNA A730017D01 gene                                                         |                           | 3.069                | 0.0003              |
| Diras2        | DIRAS family, GTP-binding RAS-like 2                                               | NM_001024474              | 2.976                | 0.008               |
| Sox5*         | SRY-box containing gene 5                                                          | AK081802                  | 2.915; 2.279         | 0.006; 0.005        |
| Acta1         | actin, alpha 1, skeletal muscle                                                    | NM_009606                 | 2.870                | 0.0146              |
| Smoc1         | SPARC related modular calcium binding 1                                            | NM_022316                 | 2.851                | 0.0064              |
| Chst1         | carbohydrate (keratan sulfate Gal-6) sulfotransferase 1                            | NM_023850                 | 2.836                | 0.001               |
| P2ry14*       | purinergic receptor P2Y, G-protein coupled, 14                                     | NM_133200                 | 2.828; 2.070         | 0.000; 0.001        |
| 6330404C01Rik | RIKEN cDNA 9930013L23 gene                                                         | AK018112                  | 2.762                | 0.0012              |
| LOC217066*    | hypothetical LOC217066                                                             | NM_001025564              | 2.725; 2.474         | 0.0263; 0.027       |
| 9430064K01Rik | RIKEN cDNA 9430064K01 gene                                                         |                           | 2.673                | 0.0062              |
| Nfkbiz        | nuclear factor of kappa light polypeptide gene enhancer in B-cells inhibitor, zeta | NM_030612                 | 2.657                | 0.0022              |
| Ccdc68        | coiled-coil domain containing 68                                                   | NM_201362                 | 2.612                | 0.0017              |
| 130002F13Rik  | ERBB receptor feedback inhibitor 1                                                 | NM_133753                 | 2.601                | 0.01                |
| LOC381284     | RIKEN cDNA E030010N08 gene                                                         | XM_355224                 | 2.515                | 0.0006              |
| 9830143E02Rik |                                                                                    | AK036626                  | 2.510                | 0.0377              |
| Nes           | nestin                                                                             | NM_016701                 | 2.503                | 0.0098              |
| Kng2          | kininogen 2                                                                        | NM_201375                 | 2.498                | 0.0009              |

|                 |                                                                                |              |                    |                      |
|-----------------|--------------------------------------------------------------------------------|--------------|--------------------|----------------------|
| Fst             | follistatin                                                                    | NM_008046    | 2.471              | 0.0035               |
| Nrp             | neuropilin 1                                                                   | AK030358     | 2.454              | 0.0388               |
| Car12           | carbonic anhydrase 12                                                          | NM_178396    | 2.452              | 0.0016               |
| Cbr2            | carbonyl reductase 2                                                           | NM_007621    | 2.442              | 0                    |
| Nid1            | nidogen 1                                                                      | AK049585     | 2.435              | 0.0259               |
| Fgf7            | fibroblast growth factor 7                                                     | NM_008008    | 2.430              | 0.0007               |
| Klra18          | killer cell lectin-like receptor, subfamily A, member 18                       | NM_053153    | 2.430              | 0.0163               |
| Mmp13           | matrix metalloproteinase 13                                                    | NM_008607    | 2.375              | 0.006                |
| Nr2f1           | nuclear receptor subfamily 2, group F, member 1                                | NM_010151    | 2.371              | 0.0048               |
| Cgn1            | cingulin-like 1                                                                | NM_026599    | 2.353              | 0.0028               |
| Tgm2            | transglutaminase 2, C polypeptide                                              | NM_009373    | 2.344              | 0.0007               |
| sc10001276.1_18 | epidermal growth factor-containing fibulin-like extracellular matrix protein 1 | AK077302     | 2.320              | 0.0201               |
| Serpine2        | serine (or cysteine) peptidase inhibitor, clade E, member 2                    | NM_009255    | 2.299              | 0.0157               |
| LPP*            | LIM domain containing preferred translocation partner in lipoma                | AK040185     | 2.298; 2.262; 2.24 | 0.002; 0.038; 0.0386 |
| Uncx4.1         | Unc4.1 homeobox (C. elegans)                                                   | NM_013702    | 2.260              | 0.0145               |
| Cyp1b1          | cytochrome P450, family 1, subfamily b, polypeptide 1                          | NM_009994    | 2.260              | 0.0034               |
| Cp              | ceruloplasmin                                                                  | NM_007752    | 2.259              | 0.0008               |
| Tinagl1*        | tubulointerstitial nephritis antigen-like 1                                    | NM_023476    | 2.259; 2.235       | 0.0054; 0.0049       |
| Foxc1           | forkhead box C1                                                                | NM_008592    | 2.256              | 0.0025               |
| Gata2           | GATA binding protein 2                                                         | NM_008090    | 2.250              | 0.0005               |
| Klra4           | killer cell lectin-like receptor, subfamily A, member 4                        | NM_010649    | 2.228              | 0.0018               |
| Pde1a           | phosphodiesterase 1A, calmodulin-dependent                                     | NM_016744    | 2.224              | 0.0015               |
| Aldh1a7         | aldehyde dehydrogenase family 1, subfamily A7                                  | NM_011921    | 2.215              | 0.0006               |
| Phlda1          | pleckstrin homology-like domain, family A, member 1                            | NM_009344    | 2.206              | 0.0008               |
| 9130004J05Rik   | RIKEN cDNA 9130004J05 gene                                                     |              | 2.194              | 0.0434               |
| Col10a1         | procollagen, type X, alpha 1                                                   | NM_009925    | 2.181              | 0.0046               |
| 9930105H17Rik   | RIKEN cDNA 9930105H17 gene                                                     |              | 2.165              | 0.0007               |
| Ccl9            | chemokine (C-C motif) ligand 9                                                 | NM_011338    | 2.163              | 0.0003               |
| Hoxa2*          | homeo box A2                                                                   | NM_010451    | 2.150; 2.083       | 0.001; 0.003         |
| Enah            | enabled homolog (Drosophila)                                                   | AK020248     | 2.141              | 0.0296               |
| Angptl7         | angiopoietin-like 7                                                            | NM_001039554 | 2.102              | 0.004                |
| 1700038P13Rik   | RIKEN cDNA 1700038P13 gene                                                     |              | 2.089              | 0.0013               |
| C730013O11Rik   |                                                                                | AK050083     | 2.086              | 0.0049               |
| Adora2b         | adenosine A2b receptor                                                         | NM_007413    | 2.075              | 0.0011               |
| Sh3md2          | SH3 domain containing ring finger 1                                            | NM_198678    | 2.063              | 0.0007               |

|               |                                                             |              |                      |                    |
|---------------|-------------------------------------------------------------|--------------|----------------------|--------------------|
| Ybx3          | RIKEN cDNA 1200016E24 gene                                  | AK029441     | 2.062                | 0.0045             |
| Grem1         | gremlin 1                                                   | NM_011824    | 2.044                | 0.0034             |
| LOC214403     | predicted gene, EG214403                                    | XM_129490    | 2.043                | 0.0005             |
| Hoxa7         | homeo box A7                                                | NM_010455    | 2.027                | 0.0213             |
| Msn           | moesin                                                      | AK031171     | 2.026                | 0.0224             |
| Dgkh          | diacylglycerol kinase, eta                                  | XM_484397    | 2.025                | 0.0256             |
| 9830134K01Rik | mannoside acetylglucosaminyltransferase 5                   | AK036567     | 2.023                | 0.0259             |
| Cfd           | complement factor D (adipsin)                               | NM_013459    | -7.092               | 0.000              |
| Gpr49         | leucine rich repeat containing G protein coupled receptor 5 | NM_010195    | -6.270               | 0.006              |
| Msx1          | homeo box, msh-like 1                                       | NM_010835    | -6.165               | 0.001              |
| Adh7          | alcohol dehydrogenase 7 (class IV), mu or sigma polypeptide | NM_009626    | -6.031               | 0.000              |
| Krt1-14       | keratin 14                                                  | NM_016958    | -6.013               | 0.003              |
| Tcfap2b*      | transcription factor AP-2 beta                              | NM_001025305 | -5.434;-3.367;-3.289 | 0.000;0.012; 0.008 |
| Apod          | apolipoprotein D                                            | NM_007470    | -4.914               | 0.011              |
| Acde          | adiponectin, C1Q and collagen domain containing             | NM_009605    | -4.047               | 0.001              |
| BC054438      | cDNA sequence BC054438                                      | NM_001001183 | -3.964               | 0.005              |
| Slc14a2*      | solute carrier family 14 (urea transporter), member 2       | NM_030683    | -3.940;-3.786        | 0.0016; 0.0061     |
| G1p2          | ISG15 ubiquitin-like modifier                               | NM_015783    | -3.865               | 0.023              |
| Bcl11b        | B-cell leukemia/lymphoma 11B                                | NM_021399    | -3.740               | 0.009              |
| Usp18*        | ubiquitin specific peptidase 18                             | NM_011909    | -3.646;-2.850        | 0.004; 0.000       |
| Chodl         | chondrolectin                                               | NM_139134    | -3.587               | 0.001              |
| Ndg2          | Nur77 downstream gene 2                                     | NM_175329    | -3.583               | 0.002              |
| Matn4         | matrilin 4                                                  | NM_013592    | -3.357               | 0.039              |
| Oasl2*        | 2'-5' oligoadenylate synthetase-like 2                      | NM_011854    | -3.505;-2.157        | 0.004; 0.0244      |
| Cxcl15        | chemokine (C-X-C motif) ligand 15                           | NM_011339    | -3.257               | 0.014              |
| 9130430L19Rik | RIKEN cDNA 9130430L19 gene                                  |              | -3.108               | 0.000              |
| Adh1*         | alcohol dehydrogenase 1 (class I)                           | NM_007409    | -3.066;-2.428        | 0.0034; 0.0004     |
| Tbxa2r*       | thromboxane A2 receptor                                     | NM_009325    | -3.058;-2.890        | 0.004; 0.004       |
| Slpi          | secretory leukocyte peptidase inhibitor                     | NM_011414    | -2.953               | 0.000              |
| Slit3*        | slit homolog 3 (Drosophila)                                 | XM_203363    | -2.892;-2.042        | 0.0019; 0.0011     |
| Odz4          | odd Oz/ten-m homolog 4 (Drosophila)                         | NM_011858    | -2.874               | 0.011              |
| Ifit3         | interferon-induced protein with tetratricopeptide repeats 3 | NM_010501    | -2.854               | 0.005              |
| Ldb2*         | LIM domain binding 2                                        | NM_010698    | -2.820;-2.686        | 0.0163; 0.01       |
| Lpl           | lipoprotein lipase                                          | NM_008509    | -2.811               | 0.001              |
| C2            | complement component 2 (within H-2S)                        | NM_013484    | -2.796               | 0.029              |
| LOC226866     | gene model 106, (NCBI)                                      | XM_129714    | -2.731               | 0                  |

|               |                                                                                               |              |                        |                       |
|---------------|-----------------------------------------------------------------------------------------------|--------------|------------------------|-----------------------|
| Mfap4         | microfibrillar-associated protein 4                                                           | NM_029568    | -2.725                 | 0.040                 |
| LOC380706     | gene model 881, (NCBI)                                                                        | XM_354621    | -2.679                 | 0.018                 |
| Plvap         | plasmalemma vesicle associated protein                                                        | NM_032398    | -2.667                 | 0.010                 |
| Osr2          | odd-skipped related 2 (Drosophila)                                                            | NM_054049    | -2.519; -2.331         | 0.013; 0.005          |
| Fgf21         | fibroblast growth factor 21                                                                   | NM_020013    | -2.516                 | 0.008                 |
| Adams2*       | a disintegrin-like and metallopeptidase (reprolysin type) with thrombospondin type 1 motif, 2 | NM_175643    | -2.489; -2.435         | 0.0204; 0.0259        |
| Pcdha1        | protocadherin alpha 1                                                                         | NM_054072    | -2.484                 | 0.001                 |
| Sorcs2        | sortilin-related VPS10 domain containing receptor 2                                           | NM_030889    | -2.477                 | 0.007                 |
| C130057K09    | ADAMTS-like 3                                                                                 | XM_194370    | -2.466                 | 0.000                 |
| 1110062M06Rik | RIKEN cDNA 1110062M06 gene                                                                    |              | -2.399                 | 0.015                 |
| Tnfrsf5       | CD40 antigen                                                                                  | NM_170704    | -2.385                 | 0.000                 |
| Tmem119       | transmembrane protein 119                                                                     | NM_146162    | -2.350                 | 0.004                 |
| Socs2         | suppressor of cytokine signaling 2                                                            | NM_007706    | -2.346                 | 0.007                 |
| Ctsk          | cathepsin K                                                                                   | NM_007802    | -2.340                 | 0.002                 |
| Egfl3 (Megf6) | multiple EGF-like-domains 6                                                                   | NM_172273    | -2.317                 | 0.018                 |
| Tnn           | tenascin N                                                                                    | NM_177839    | -2.316                 | 0.000                 |
| Pdgfrl        | platelet-derived growth factor receptor-like                                                  | NM_026840    | -2.300                 | 0.016                 |
| D330027H18Rik | RIKEN cDNA D330027H18 gene                                                                    | XM_149840    | -2.264                 | 0.002                 |
| Tbx4          | T-box 4                                                                                       | NM_011536    | -2.264                 | 0.006                 |
| Angptl1       | angiopoietin-like 1                                                                           | NM_028333    | -2.261                 | 0.048                 |
| Vegfc         | vascular endothelial growth factor C                                                          | NM_009506    | -2.254                 | 0.000                 |
| Igtp          | interferon gamma induced GTPase                                                               | NM_018738    | -2.253                 | 0.018                 |
| Megf10*       | multiple EGF-like-domains 10                                                                  | NM_001001979 | -2.235; -2.199         | 0.008; 0.0051         |
| Trib3*        | tribbles homolog 3 (Drosophila)                                                               | NM_144554    | -2.231; -2.228; -2.278 | 0.003; 0.0017; 0.0021 |
| Cdh3          | cadherin 3                                                                                    | NM_007665    | -2.231                 | 0.007                 |
| Lgi2          | leucine-rich repeat LGI family, member 2                                                      | NM_144945    | -2.228                 | 0.024                 |
| Irf7          | interferon regulatory factor 7                                                                | NM_016850    | -2.220                 | 0.041                 |
| Mfap5         | microfibrillar associated protein 5                                                           | NM_015776    | -2.220                 | 0.003                 |
| Sema5a*       | sema domain, (semaphorin) 5A                                                                  | NM_009154    | -2.212; -2.06          | 0.0006; 0.0064        |
| Epb4.114b*    | erythrocyte protein band 4.1-like 4b                                                          | NM_019427    | -2.208; -2.205         | 0.0015; 0.0018        |
| Parp14        | poly (ADP-ribose) polymerase family, member 14                                                | NM_001039530 | -2.206                 | 0.038                 |
| Hoxd8         | homeo box D8                                                                                  | XM_355338    | -2.192                 | 0.001                 |
| Dpt           | dermatopontin                                                                                 | NM_019759    | -2.179                 | 0.002                 |
| Slc7a3        | solute carrier family 7 (cationic amino acid transporter, y+ system), member 3                | NM_007515    | -2.177                 | 0.000                 |
| Hsd17b1       | hydroxysteroid (17-beta) dehydrogenase 1                                                      | NM_010475    | -2.163                 | 0.011                 |

|               |                                                         |           |                |              |
|---------------|---------------------------------------------------------|-----------|----------------|--------------|
| Cd40          | CD40 antigen                                            | NM_170702 | -2.160         | 0.001        |
| Tcfap2a       | transcription factor AP-2, alpha                        | NM_011547 | -2.160; -2.387 | 0.001; 0.000 |
| Lgals3bp      | lectin, galactoside-binding, soluble, 3 binding protein | NM_011150 | -2.139         | 0.019        |
| 3830422K02Rik | inscuteable homolog (Drosophila)                        | NM_173767 | -2.133         | 0.014        |
| Flt1          | FMS-like tyrosine kinase 1                              | NM_010228 | -2.128         | 0.035        |
| Igfbp3        | insulin-like growth factor binding protein 3            | NM_008343 | -2.124         | 0.015        |
| Mmp11         | matrix metalloproteinase 11                             | NM_008606 | -2.117         | 0.007        |
| Hey1          | hairy/enhancer-of-split related with YRPW motif 1       | NM_010423 | -2.107         | 0.000        |
| BC046404*     | cDNA sequence BC046404                                  | NM_198861 | -2.105; -2.012 | 0.0; 0.0098  |
| 2810032G03Rik | RIKEN cDNA 2810032G03 gene                              | NM_028318 | -2.093         | 0.001        |
| Comp          | cartilage oligomeric matrix protein                     | NM_016685 | -2.074         | 0.044        |
| D230005D02Rik | RIKEN cDNA D230005D02 gene                              | NM_172813 | -2.067         | 0.001        |
| Htra1*        | HtrA serine peptidase 1                                 | NM_019564 | -2.062; -2.016 | 0.001; 0.002 |
| C1qtnf3       | C1q and tumor necrosis factor related protein 3         | NM_030888 | -2.054         | 0.011        |
| Cox6a2        | cytochrome c oxidase, subunit VI a, polypeptide 2       | NM_009943 | -2.029         | 0.005        |
| Qpct          | glutaminy-peptide cyclotransferase (glutaminy cyclase)  | NM_027455 | -2.026         | 0.000        |
| H2-T23        | histocompatibility 2, T region locus 23                 | NM_010398 | -2.005         | 0.011        |

\* Genes identified by multiple probes. The corresponding fold changes and P values are listed for each probe.
